# Supplementary material
Source: MDPI journal article supplement (https://www.mdpi.com/2304-6740/11/5/208)
Supplement: s1 [file s1]

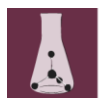

Electronic supporting information

## Interaction of redox active Copper(II) with catecholamines: A combined spectroscopic and theoretical study

Miriama Šimunková <sup>1,\*</sup>, Zuzana Barbieriková <sup>1</sup>, Milan Mazúr <sup>1</sup>, Marián Valko <sup>1</sup>, Suliman Y. Alomar <sup>2</sup>, Saleh H. Alwasel <sup>2</sup> and Michal Malček <sup>1</sup>

<sup>1</sup> Department of Physical Chemistry, Institute of Physical Chemistry and Chemical Physics, Faculty of Chemical and Food Technology, Slovak University of Technology, Radlinského 9, 812 37, Bratislava, Slovakia; miriama.simunkova@stuba.sk

<sup>2</sup> King Saud University, Zoology Department, College of Science, Riyadh, 11451, Saudi Arabia; e-mail@e-mail.com

\* Correspondence: miriama.simunkova@stuba.sk; (if there are multiple corresponding authors, add author initials)

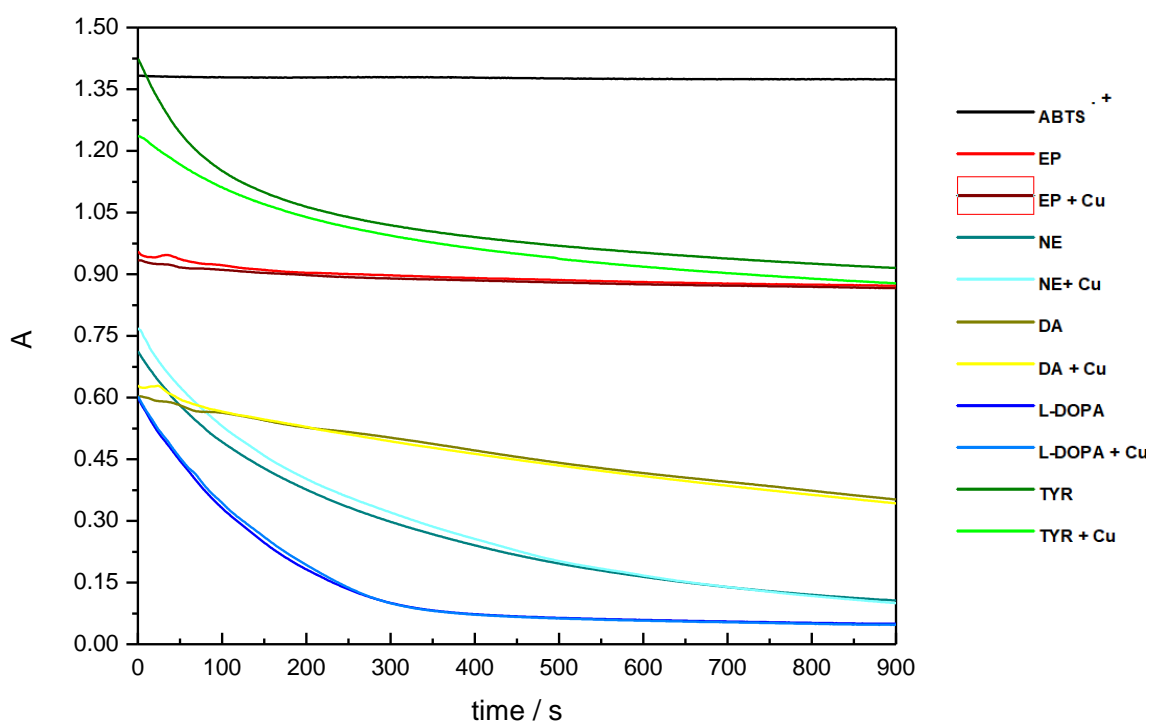

**Figure S1** Scavenging of ABTS<sup>•+</sup> by studied compounds and their Cu(II) complexes (fresh)

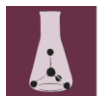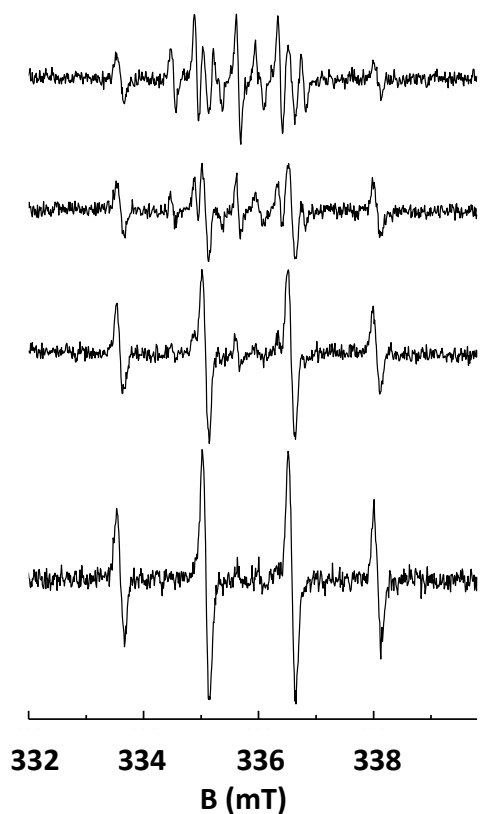

### Experiment

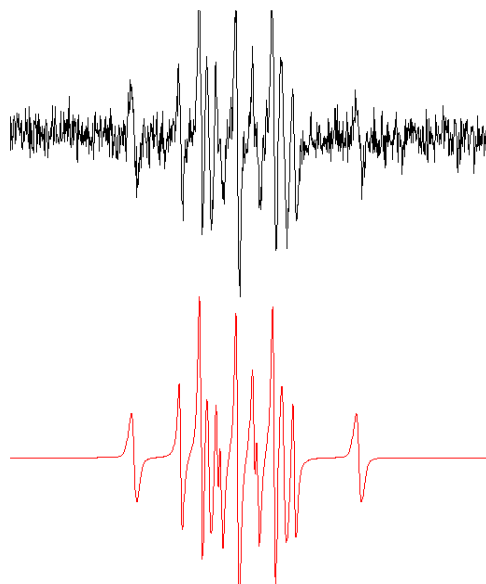

### Simulation

36% DMPO-OH + 64% DMPOX

**Figure S2** EPR spectra of  $\bullet$ DMPO-OH and  $\bullet$ DMPOX measured with starting acquisition 2 min after the addition of hydrogen peroxide to aqueous solution of  $\text{CuCl}_2$  + EP containing DMPO spin trapping agent.

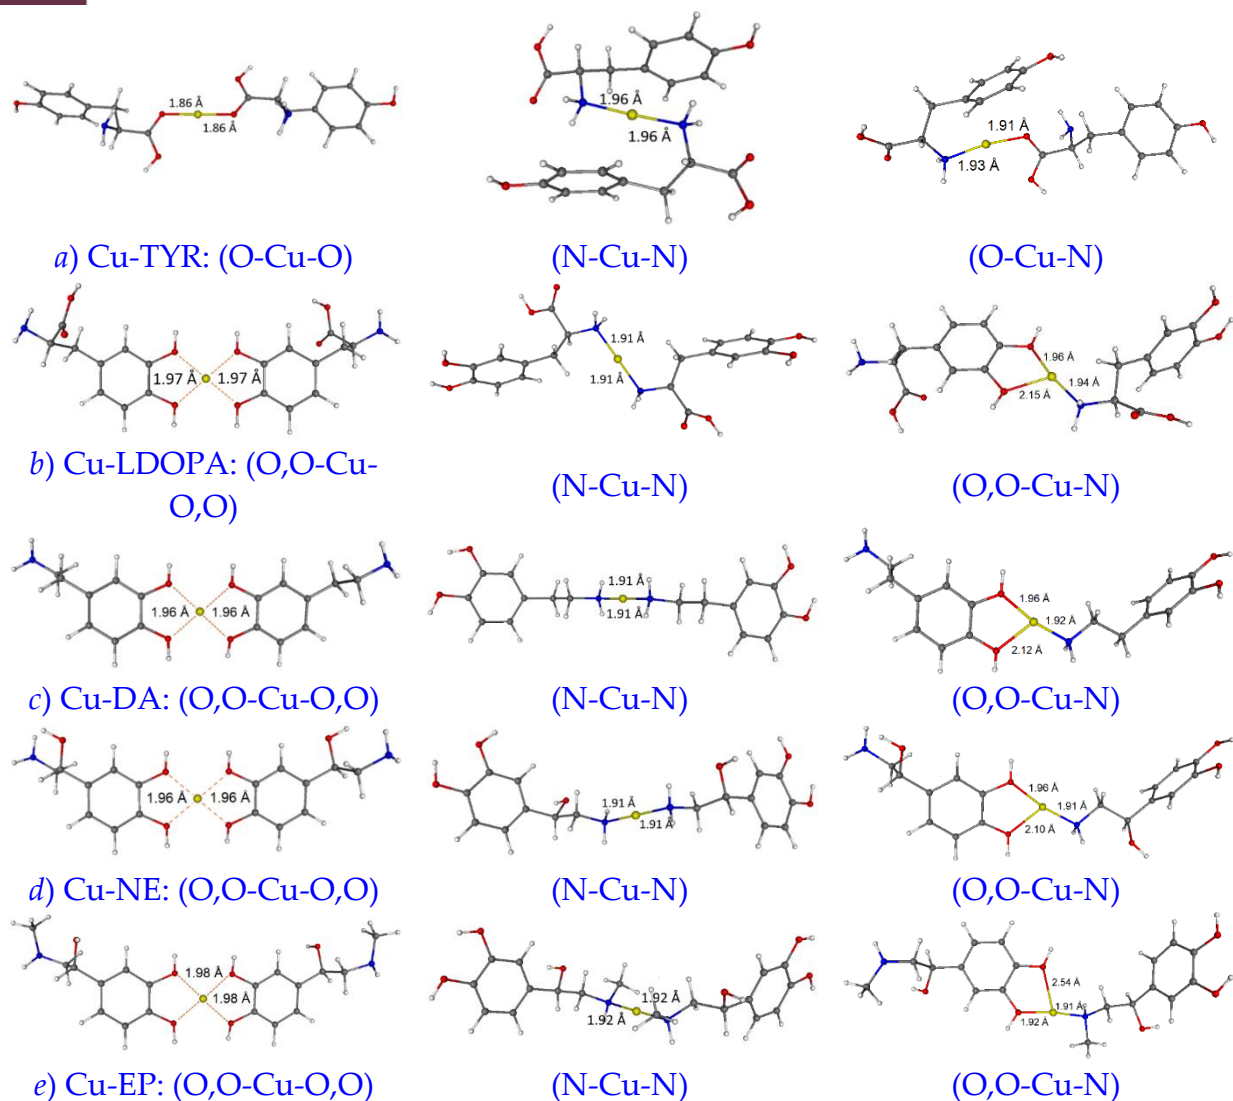

**Figure S3** Optimized B3LYP/6-311G\* structures of the studied Cu-complexes (molar ratio 1:2), including calculated Cu-O and Cu-N bond distances.

**Table S1** Calculated B3LYP/6-311G\* Cu-O, Cu-N bond distances, and corresponding QTAIM characteristics of the studied complexes (Cu : Ligand molar ratio is 1:2).

| Complex             | Binding             | d(Cu-X) / Å                           | $\rho_{\text{BCP}}(\text{Cu-X}) / \text{bohr}^{-3}$ | $\Delta\rho_{\text{BCP}}(\text{Cu-X}) / \text{bohr}^{-5}$ | DI(Cu-X) / -                          |
|---------------------|---------------------|---------------------------------------|-----------------------------------------------------|-----------------------------------------------------------|---------------------------------------|
| Cu-TYR <sup>a</sup> | O-Cu-O <sup>a</sup> | 1.86 <sup>a</sup> ; 1.86 <sup>a</sup> | 0.10 <sup>a</sup> ; 0.10 <sup>a</sup>               | 0.66 <sup>a</sup> ; 0.66 <sup>a</sup>                     | 0.52 <sup>a</sup> ; 0.51 <sup>a</sup> |
|                     | N-Cu-N              | 1.96; 1.96                            | 0.10; 0.10                                          | 0.41; 0.41                                                | 0.55; 0.55                            |
|                     | O-Cu-N              | 1.91; 1.93 <sup>b</sup>               | 0.09; 0.10 <sup>b</sup>                             | 0.53; 0.44 <sup>b</sup>                                   | 0.45; 0.59 <sup>b</sup>               |
| Cu-LDOPA            | O,O-Cu-O,O          | 1.97; 1.97                            | 0.08; 0.08                                          | 0.45; 0.45                                                | 0.39; 0.38                            |
|                     |                     | 1.97; 1.97                            | 0.08; 0.08                                          | 0.45; 0.45                                                | 0.38; 0.38                            |
|                     | N-Cu-N              | 1.91; 1.91                            | 0.11; 0.11                                          | 0.50; 0.50                                                | 0.62; 0.61                            |
|                     | O,O-Cu-N            | 1.96, 2.15                            | 0.08; 0.05                                          | 0.49; 0.25                                                | 0.38; 0.25                            |
|                     |                     | 1.94 <sup>b</sup>                     | 0.10 <sup>b</sup>                                   | 0.45 <sup>b</sup>                                         | 0.58 <sup>b</sup>                     |
| Cu-DA               | O,O-Cu-O,O          | 1.97; 1.97                            | 0.08; 0.08                                          | 0.46; 0.46                                                | 0.39; 0.39                            |
|                     |                     | 1.97; 1.97                            | 0.08; 0.08                                          | 0.46; 0.46                                                | 0.39; 0.39                            |
|                     | N-Cu-N              | 1.91; 1.91                            | 0.11; 0.11                                          | 0.50; 0.50                                                | 0.63; 0.63                            |
|                     | O,O-Cu-N            | 1.96, 2.12                            | 0.08; 0.06                                          | 0.49; 0.27                                                | 0.37; 0.26                            |
|                     |                     | 1.92 <sup>b</sup>                     | 0.11 <sup>b</sup>                                   | 0.46 <sup>b</sup>                                         | 0.61 <sup>b</sup>                     |
| Cu-NE               | O,O-Cu-O,O          | 1.96; 1.96                            | 0.08; 0.08                                          | 0.46; 0.46                                                | 0.39; 0.39                            |
|                     |                     | 1.96; 1.96                            | 0.08; 0.08                                          | 0.46; 0.46                                                | 0.39; 0.39                            |
|                     | N-Cu-N              | 1.91; 1.91                            | 0.11; 0.11                                          | 0.50; 0.50                                                | 0.63; 0.63                            |
|                     | O,O-Cu-N            | 1.95, 2.10                            | 0.08; 0.06                                          | 0.50; 0.29                                                | 0.37; 0.27                            |
|                     |                     | 1.91 <sup>b</sup>                     | 0.11 <sup>b</sup>                                   | 0.45 <sup>b</sup>                                         | 0.62 <sup>b</sup>                     |
| Cu-EP               | O,O-Cu-O,O          | 1.98; 1.98                            | 0.08; 0.08                                          | 0.45; 0.44                                                | 0.38; 0.37                            |
|                     |                     | 1.98; 1.98                            | 0.08; 0.08                                          | 0.45; 0.44                                                | 0.37; 0.37                            |
|                     | N-Cu-N              | 1.92; 1.92                            | 0.11; 0.11                                          | 0.48; 0.48                                                | 0.60; 0.59                            |
|                     | O,O-Cu-N            | 1.92; 2.54                            | 0.08; 0.02                                          | 0.56; 0.09                                                | 0.42; 0.12                            |
|                     |                     | 1.91 <sup>b</sup>                     | 0.11 <sup>b</sup>                                   | 0.50 <sup>b</sup>                                         | 0.62 <sup>b</sup>                     |

<sup>a</sup> coordination via oxygens of COOH groups

<sup>b</sup> Cu-N bond

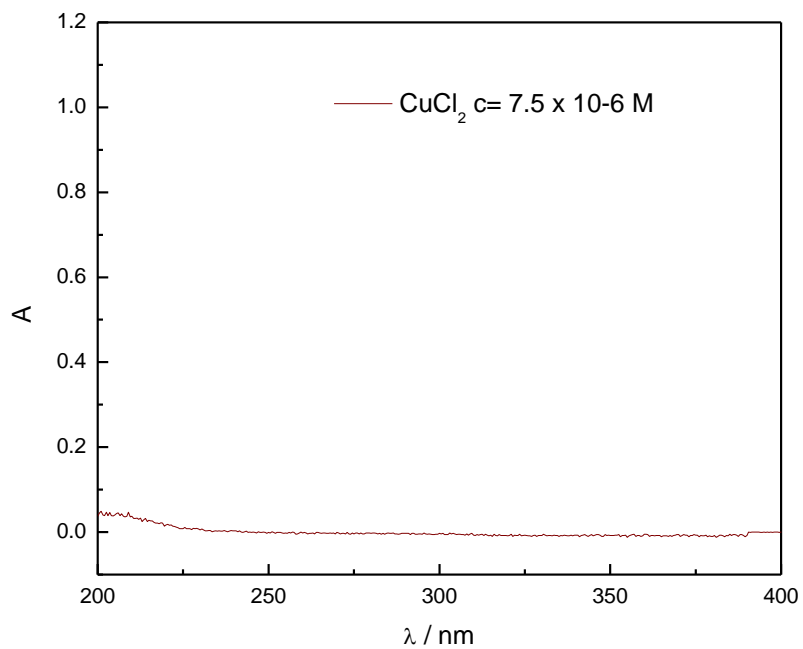

**Figure S4** UV-VIS spectrum of  $\text{CuCl}_2$  reference system,  $c_{\text{CuCl}_2} = 7.5 \times 10^{-6} \text{ M}$

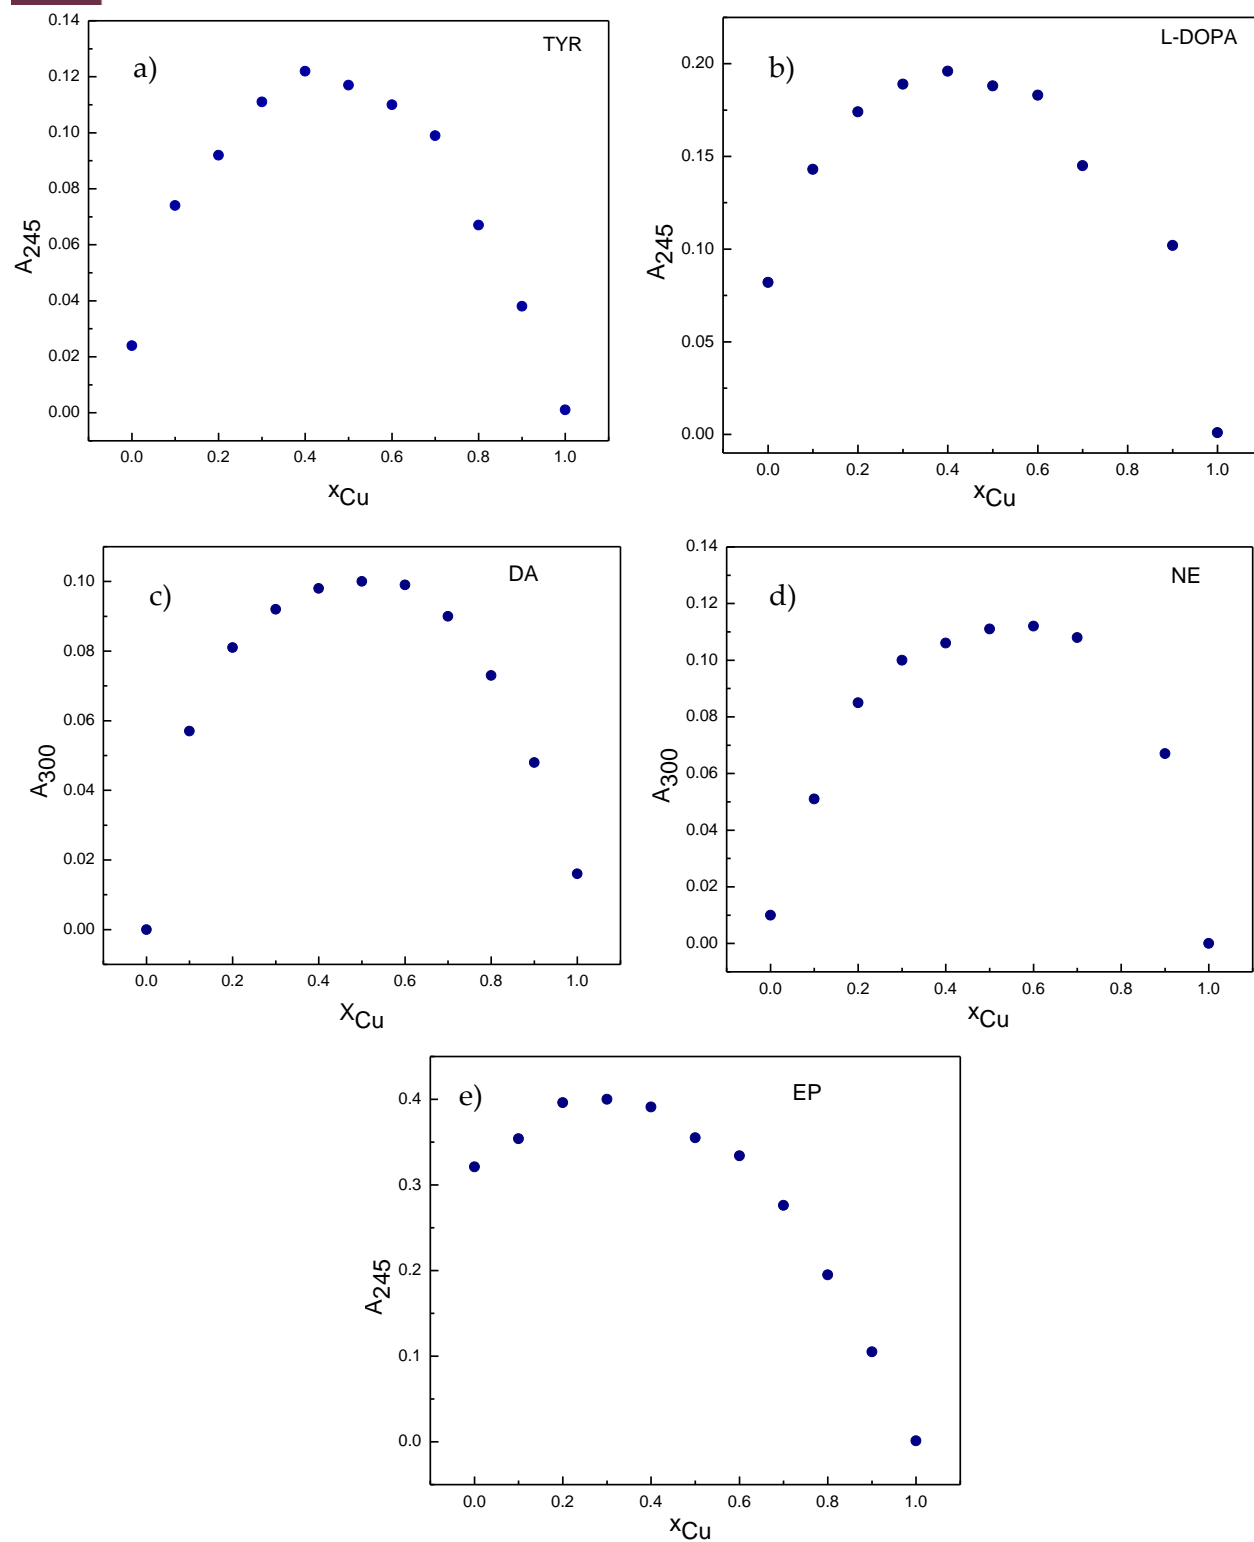

**Figure S5** Job's plots of studied compounds (a)TYR b)L-DOPA c)DA d)NE e)EP and CuCl<sub>2</sub>

Absorption spectra were measured in various molar ratios.

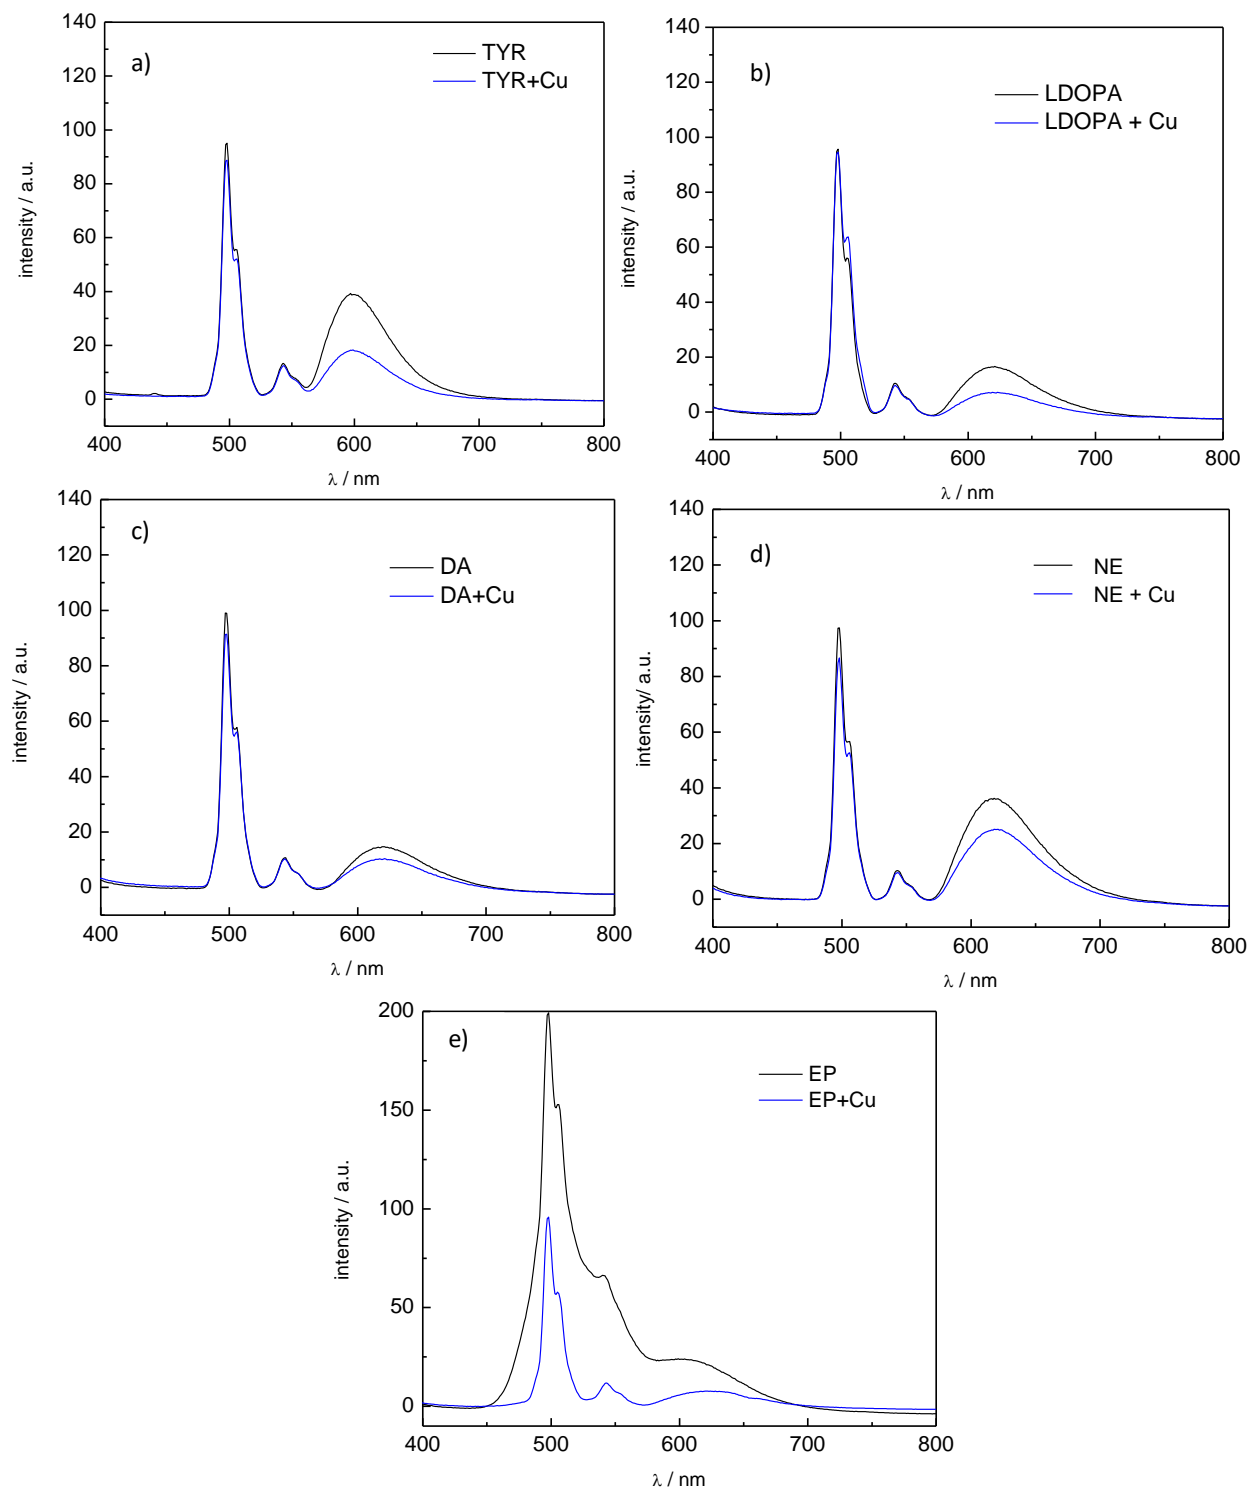

**Figure S6** Emission spectra of studied compound before (black line) and after addition of  $\text{CuCl}_2$  (blue line) in water.

Concentration of studied compounds:  $c_{\text{sample}} = 2 \times 10^{-5} \text{ M}$ ,  $c_{\text{copper(II)chloride}} = 1 \times 10^{-5} \text{ M}$

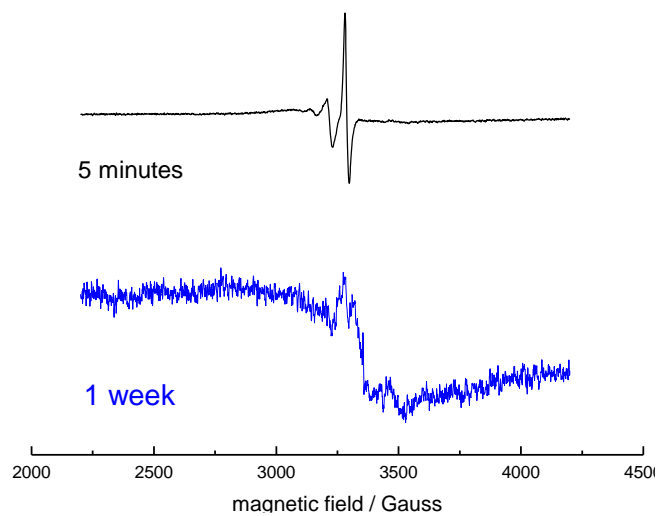

**Figure S7** EPR spectrum of Cu(II)-DA (1:2) complex at room temperature immediately after mixing (black line) and after one week (blue line)
